# Supplementary material for: Proteomic Identification of Potential Target Proteins of Cathepsin W for Its Development as a Drug Target for Influenza
Source: PubMed Central journal article supplement (PMC9431242; doi:10.1128/spectrum.00921-22), 2022-07-14
Supplement: spectrum.00921-22-s0001.pdf [file spectrum.00921-22-s0001.pdf]

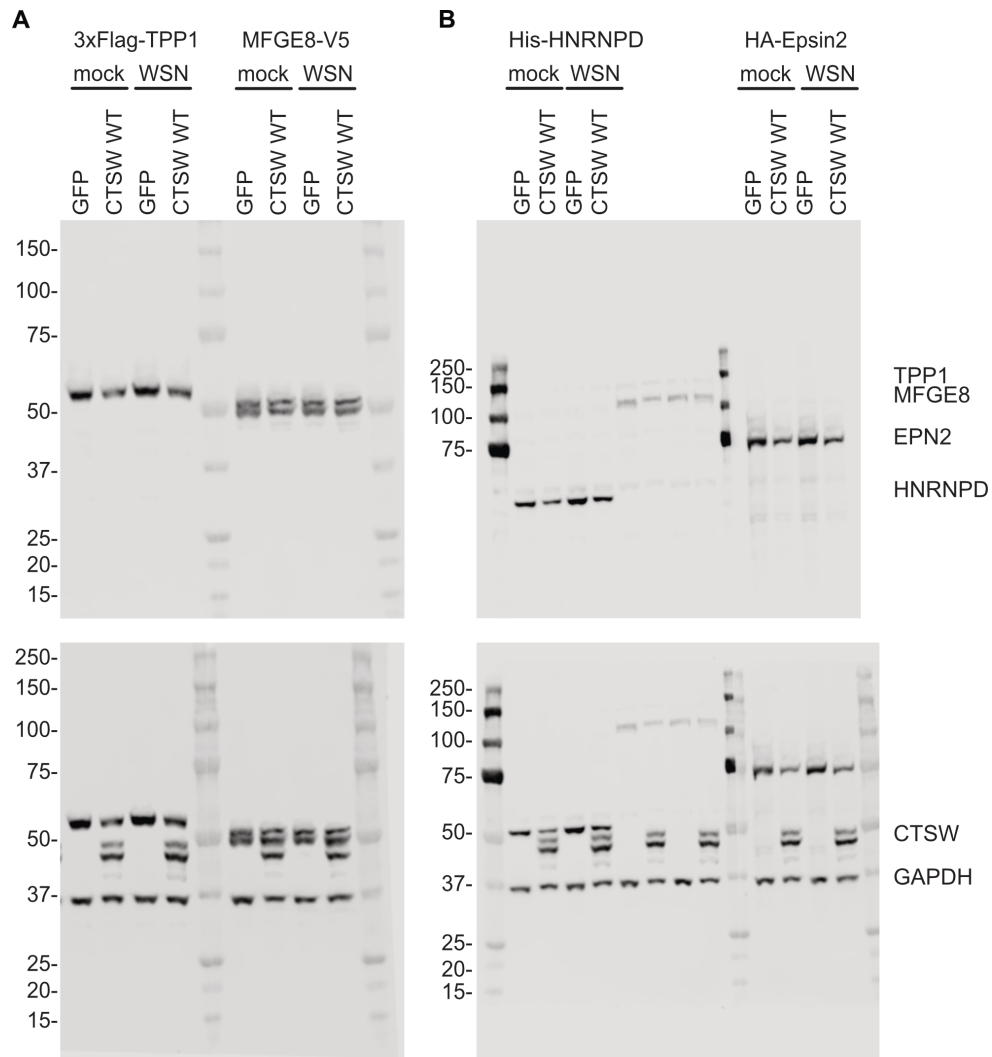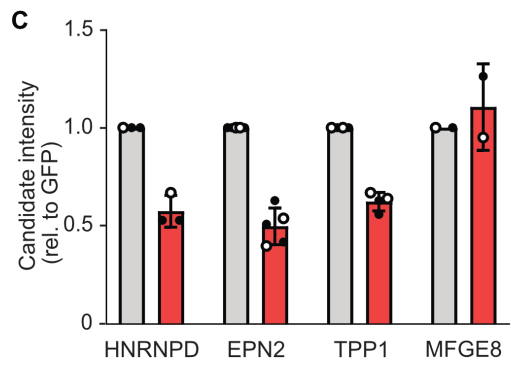

2 **Supplementary Figure S1. Levels of EPN-2, TPP1, HNRNPD, but not MFGE8 are**  
3 **reduced upon expression of CTSW.** (A-B) Original blots from figure 2E are shown. Blots  
4 were first stained against the tag of the candidates (top blots), then for CTSW and GAPDH  
5 (lower blots). Blots in (B) contain four lanes in the middle that are not relevant to data  
6 shown in figure 2E. (C) Band intensities for the target proteins were quantified from  
7 multiple independent blots, normalized to GAPDH levels and are given relative to the  
8 GFP-expressing control. Grey bars depict relative intensities from GFP-expressing cells  
9 (set to 1), red bars show relative intensities for CTSW-expressing cells. Black dots  
10 represent results from mock infected cells, white dots from infected cells. Error bars  
11 display standard deviation.

12
